# Supplementary material for: Self-assembled metallo-macrocycle based coordination polymers with unsymmetrical amide ligands
Source: Royal Society of Chemistry journal article supplement (doi:10.1039/c1dt10853k), 2011-01-01
Supplement: c1dt10853k.pdf [file c1dt10853k.pdf]

**Supplementary Information for**

**Self-assembled metallo-macrocycle based coordination polymers  
with unsymmetrical amide ligands**

**Maisara Abdul-Kadir,<sup>a</sup> Lyall R. Hanton,<sup>b</sup> and Christopher J. Sumby<sup>a\*</sup>**

<sup>a</sup> School of Chemistry & Physics, The University of Adelaide, Adelaide, SA 5005, Australia.

Phone +61 8 8303 7406. Fax. +61 8 8303 4358. Email:

[christopher.sumby@adelaide.edu.au](mailto:christopher.sumby@adelaide.edu.au)

<sup>b</sup> Department of Chemistry, University of Otago, Dunedin, New Zealand.

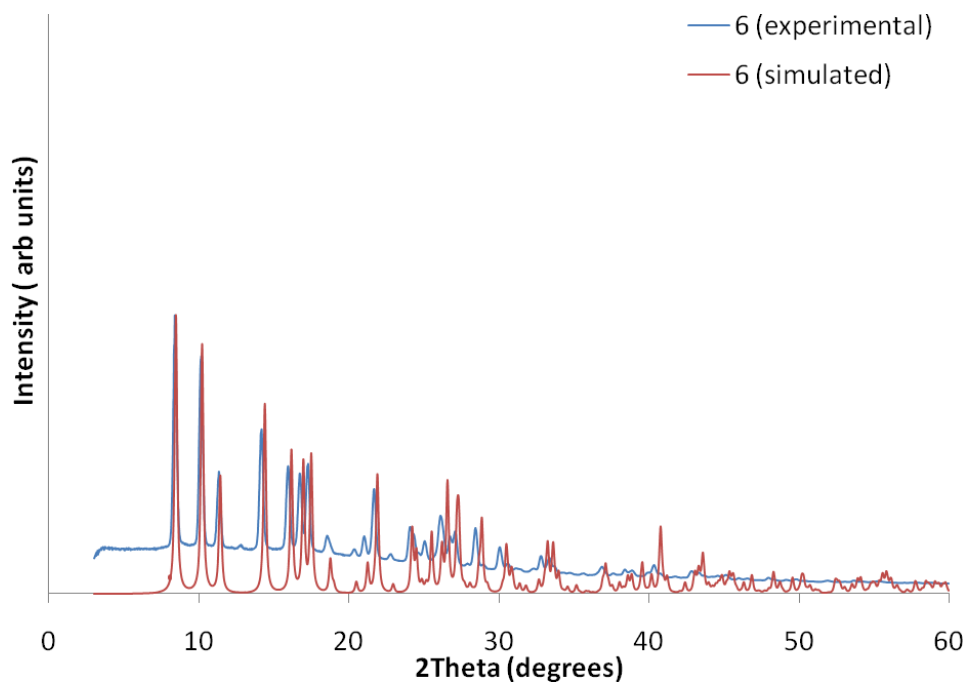

**Figure S1.** Comparison of the experimental PXR D data for a sample of as-synthesized **6** and the pattern simulated from the single-crystal X-ray data for **6**.

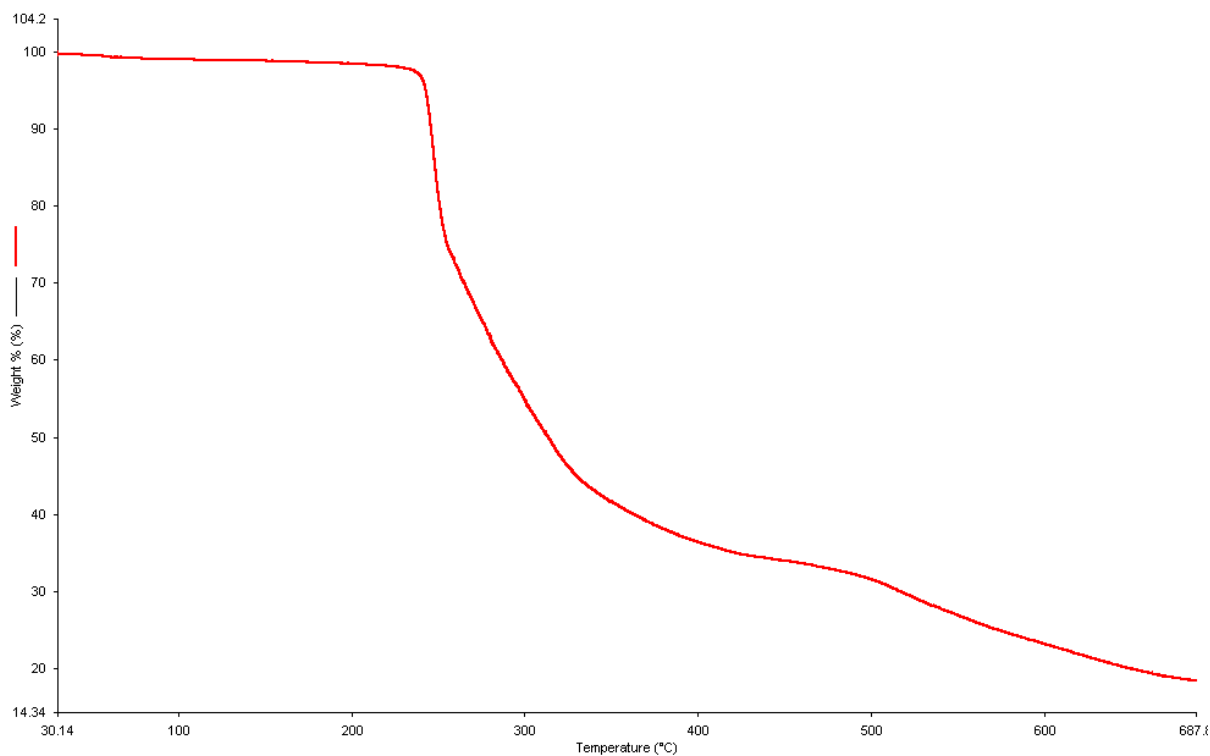

**Figure S2.** TGA trace for compound **6**.

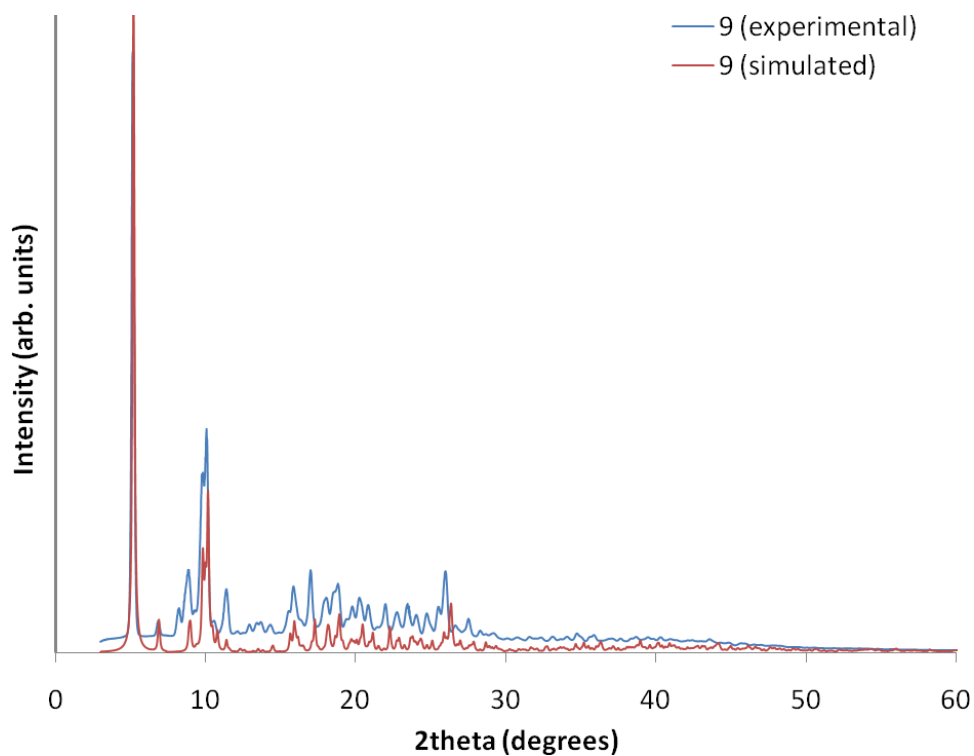

**Figure S3.** Comparison of the experimental PXRD data for a sample of as-synthesized **9** and the pattern simulated from the single-crystal X-ray data for **9**.

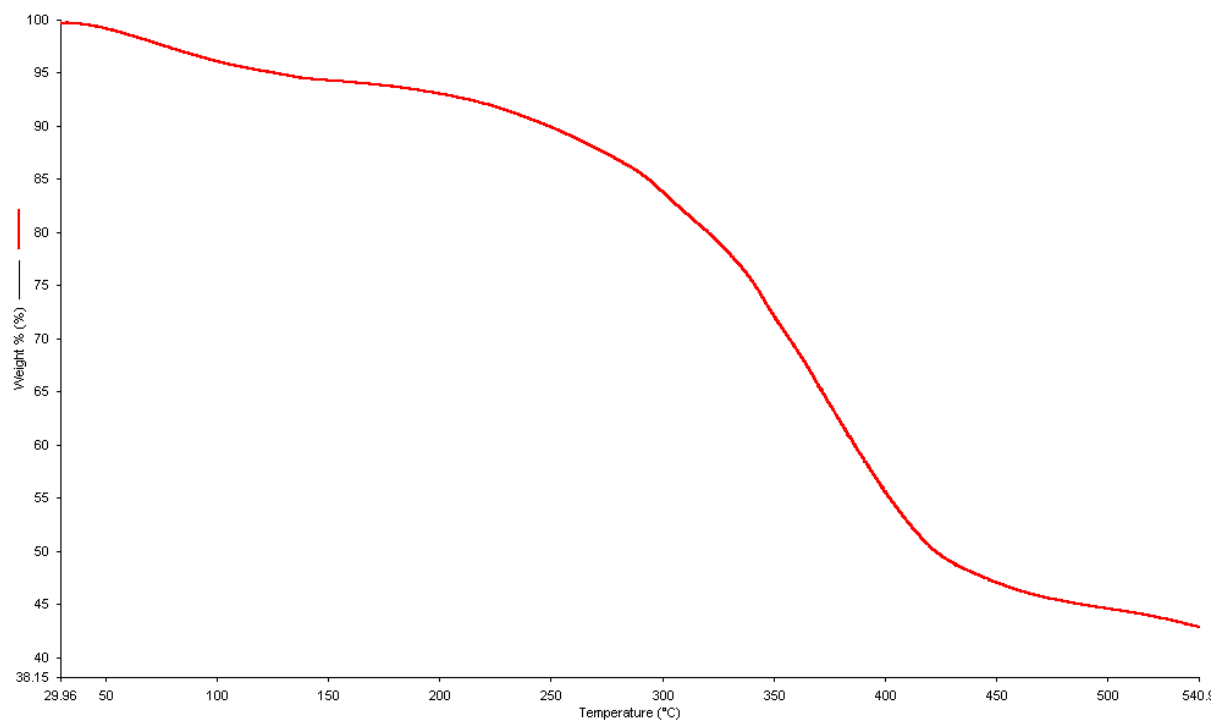

**Figure S4.** TGA trace for compound **9**.
